23. He GW, Yang CQ: Characteristics of adrenoceptors in the human radial artery: Clinical implications. *J Thorac Cardiovasc Surg* 1998; 115:1136–41
24. Kim JM, Arakawa K, Bliss J: Arterial cannulation: Factors in the development of occlusion. *Anesth Analg* 1975; 54:836–41
25. Latham GJ, Bosenberg AT, Low DK: Images in anesthesiology: Radial artery spasm in an infant as documented by high-frequency micro-ultrasound. *ANESTHESIOLOGY* 2014; 120:1254
26. Kim SY, Lee JS, Kim WO, Sun JM, Kwon MK, Kil HK: Evaluation of radial and ulnar blood flow after radial artery cannulation with 20- and 22-gauge cannulae using duplex Doppler ultrasound. *Anaesthesia* 2012; 67:1138–45

## ANESTHESIOLOGY REFLECTIONS FROM THE WOOD LIBRARY-MUSEUM

### Shadowing the Abbot: Wood Library-Museum Graphic Illustrators Bill and Janet Lyle

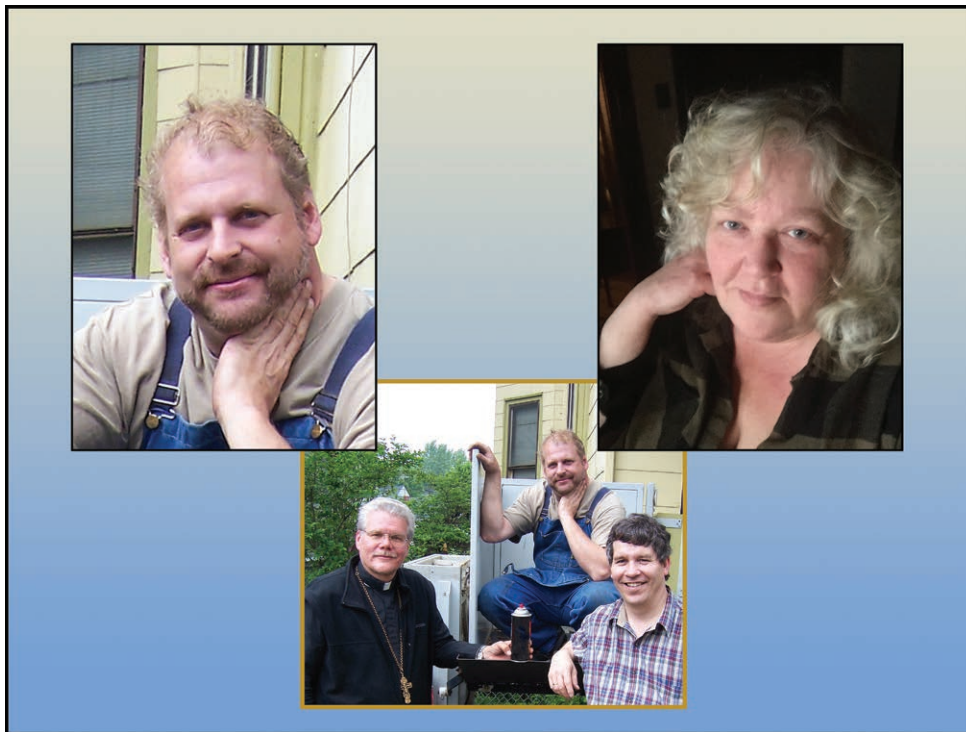

An earlier vignette reflected Wood Library-Museum (WLM) exhibit designer John Byrne “Shadowing the Abbess.” We now segue with “Shadowing the Abbot”: Father John Henry (*bottom, standing left*), the final Abbot of St. Herman’s Monastery in Cleveland, Ohio. When the monastery’s wheelchair lift at the men’s shelter needed repairs, these were funded by the author and accomplished by electrician William “Bill” Lyle (*upper left*). Before mastering the Ohio electrical code to full licensure *without a mentor*, Mr. Lyle had taught himself every graphics version of Photoshop and Illustrator. I have never met a brighter fellow. Bill composed signage for the Wood Library-Museum’s Park Ridge galleries, generated Wood Library-Museum exhibit graphics for American Society of Anesthesiologists Annual Meetings (2000 to 2011), and illustrated the initial 115 Reflections for *ANESTHESIOLOGY*. After Bill suffered a devastating stroke in May of 2011, his wife Janet (*upper right*) grabbed the computer keyboard and generated 600-plus additional *ANESTHESIOLOGY* Reflection images before retiring in April of 2020. The Wood Library-Museum thanks the Lyles for all of their artistic contributions to *ANESTHESIOLOGY* and to the Wood Library-Museum over the past 28 years. (Copyright © the American Society of Anesthesiologists’ Wood Library-Museum of Anesthesiology.)

George S. Bause, M.D., M.P.H., Clinical Associate Professor, Case Western Reserve University, Cleveland, Ohio.
